# Supplementary material for: Multi-Probe Nano-Genomic Biosensor to Detect S. aureus from Magnetically-Extracted Food Samples
Source: MDPI journal article supplement (doi:10.3390/bios13060608), 2023-06-02
Supplement: s1 [file s1]

# Multi-Probe Nano-Genomic Biosensor to Detect *S. aureus* from Magnetically-Extracted Food Samples

Chelsie Boodoo, Emma Dester, Jeswin David, Vedi Patel, Rabin KC and Evangelyn C. Alocilja \*

**Table S1.** Significance of fixed effects ( $P > F$ ) and associated F statistic on treatments for the three experiments conducted. Within each experiment, p values followed by \*\*\* are significantly different at 0.001 alpha level. For food and sensitivity experiments, treatments were considered fixed effects; for specificity experiments, treatment, time, and treatment x time interaction were considered fixed effects.

| Fixed Effects    | Experiment  |            |             |            |             |            |
|------------------|-------------|------------|-------------|------------|-------------|------------|
|                  | Food        |            | Sensitivity |            | Specificity |            |
|                  | F Statistic | p-Value    | F Statistic | p-Value    | F Statistic | p-Value    |
| Treatment        | 428.2       | <0.001 *** | 435.9       | <0.001 *** | 175.7       | <0.001 *** |
| Time             | --          | --         | --          | --         | 78.7        | <0.001 *** |
| Time x Treatment | --          | --         | --          | --         | 11.4        | <0.001 *** |

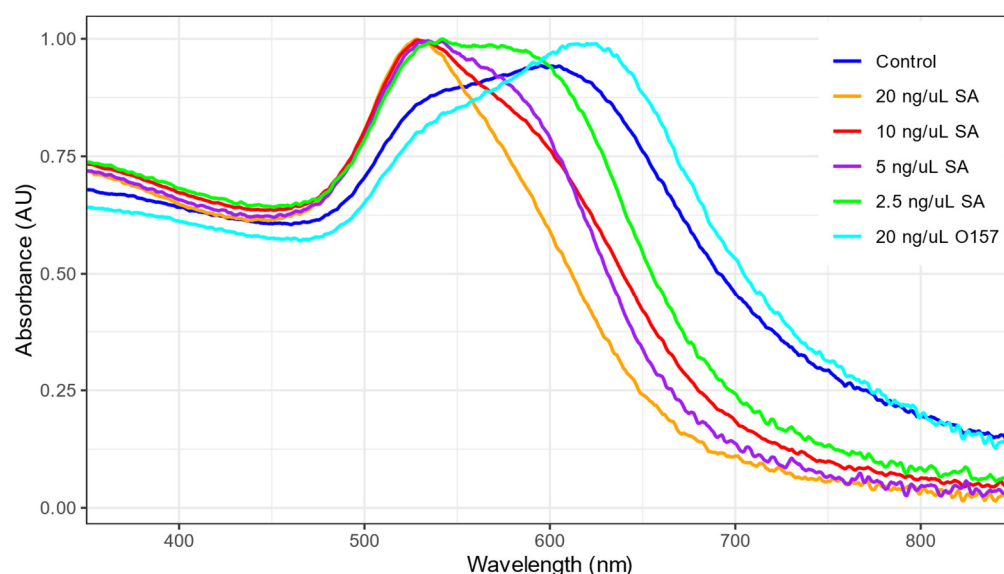

**Figure S1.** Spectra shows the sensitivity of the GNP biosensor 5 minutes after HCl 0.1 M is added to protonate the GNPs for 9 replicates. The control is nuclease-free water; the nontarget is *E. coli* O157 at 20 ng/ $\mu$ L. The target samples of *S. aureus* are 20, 10, 5, and 2.5 ng/ $\mu$ L.
